# Supplementary material for: Asymmetric Supercapacitors Using Porous Carbons and Iron Oxide Electrodes Derived from a Single Fe Metal-Organic Framework (MIL-100 (Fe))
Source: MDPI journal article supplement (doi:10.3390/nano13121824), 2023-06-08
Supplement: s1 [file s1]

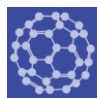

Supplementary Materials

# Asymmetric Supercapacitors Using Porous Carbons and Iron Oxide Electrodes Derived From a Single Fe Metal-Organic Framework

Seong Cheon Kim <sup>1,2</sup>, Siyoung Q. Choi<sup>1,3</sup>, and Jeasung Park <sup>2,\*</sup>

Department of Chemical and Biomolecular Engineering, Korea Advanced Institute of Science and Technology (KAIST), Daejeon, 34141, South Korea

<sup>2</sup> Korea Institute of Industrial Technology (KITECH), 89 Yangdaegiro-gil Ipjang-myeon Seobuk-gu, Cheonan-si, Chungcheongnam-do, 31056, Republic of Korea<sup>3</sup> KAIST Institute for the Nanocentury, Korea Advanced Institute of Science and Technology (KAIST), Daejeon, 34141 Republic of Korea

\* Correspondence: jpark@kitech.re.kr

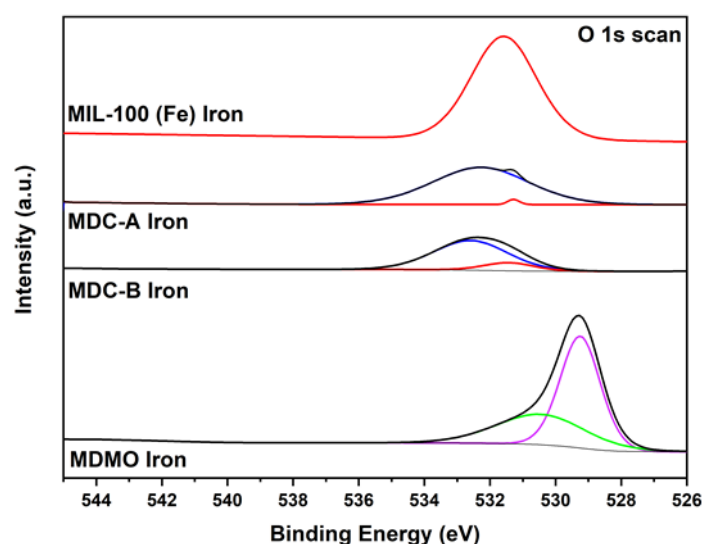

Figure S1. O 1s spectra of MIL-100(Fe) iron, MDC-A, MDC-B and MDMO.

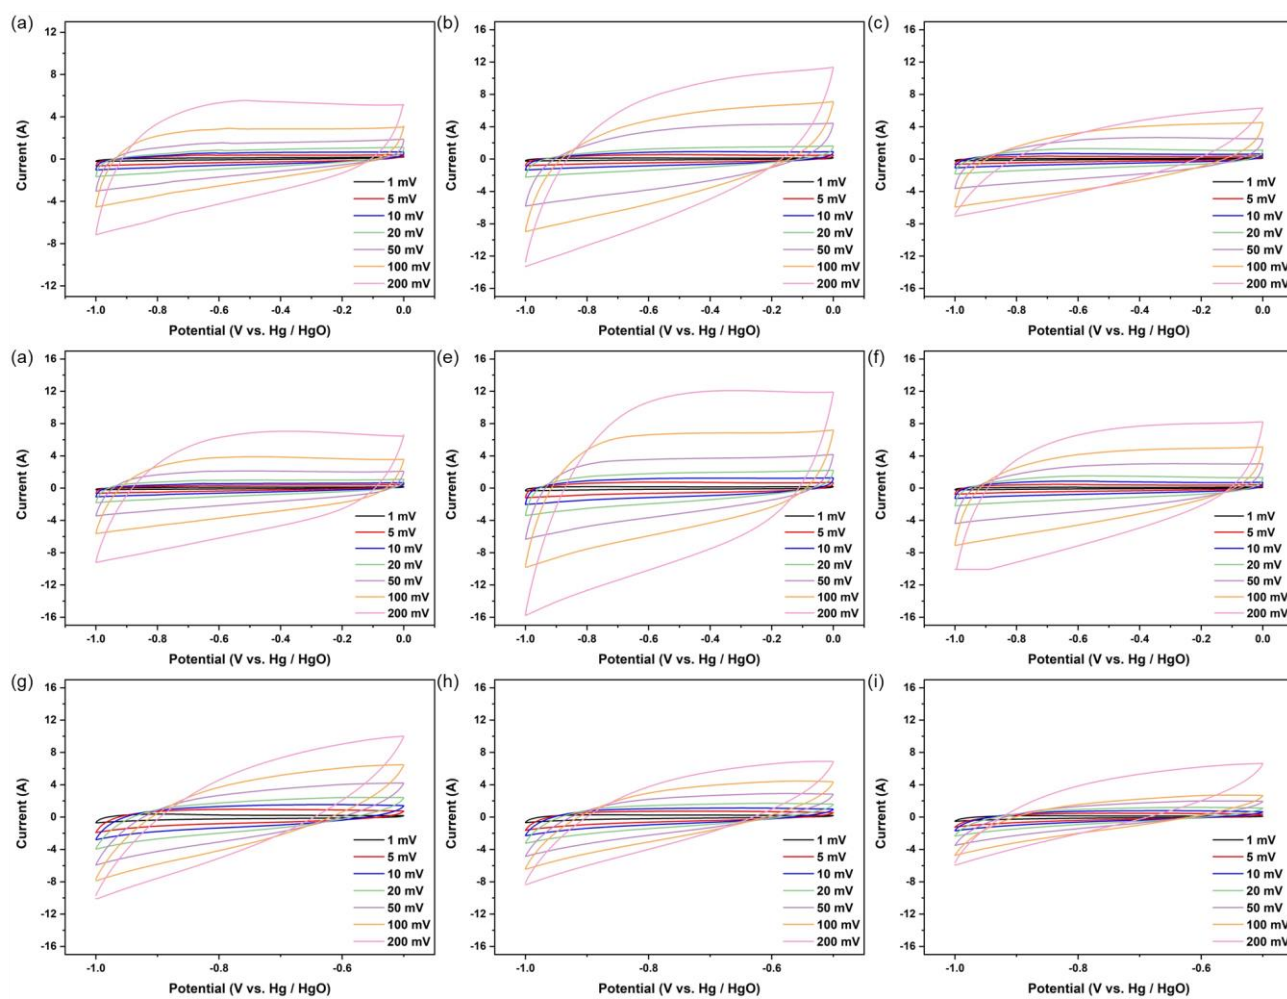

**Figure S2.** The three-electrode electrochemical performances of MIL-100 (Fe) derivatives: CV curves at different scan rates (1–200 mVs<sup>−1</sup>): (a) MDC-A iron; (b) MDC-A nitrate; (c) MDC-A chloride; (d) MDC-B iron; (e) MDC-B nitrate; (f) MDC-B chloride; (g) MDMO iron; (h) MDMO nitrate; (i) MDMO chloride.

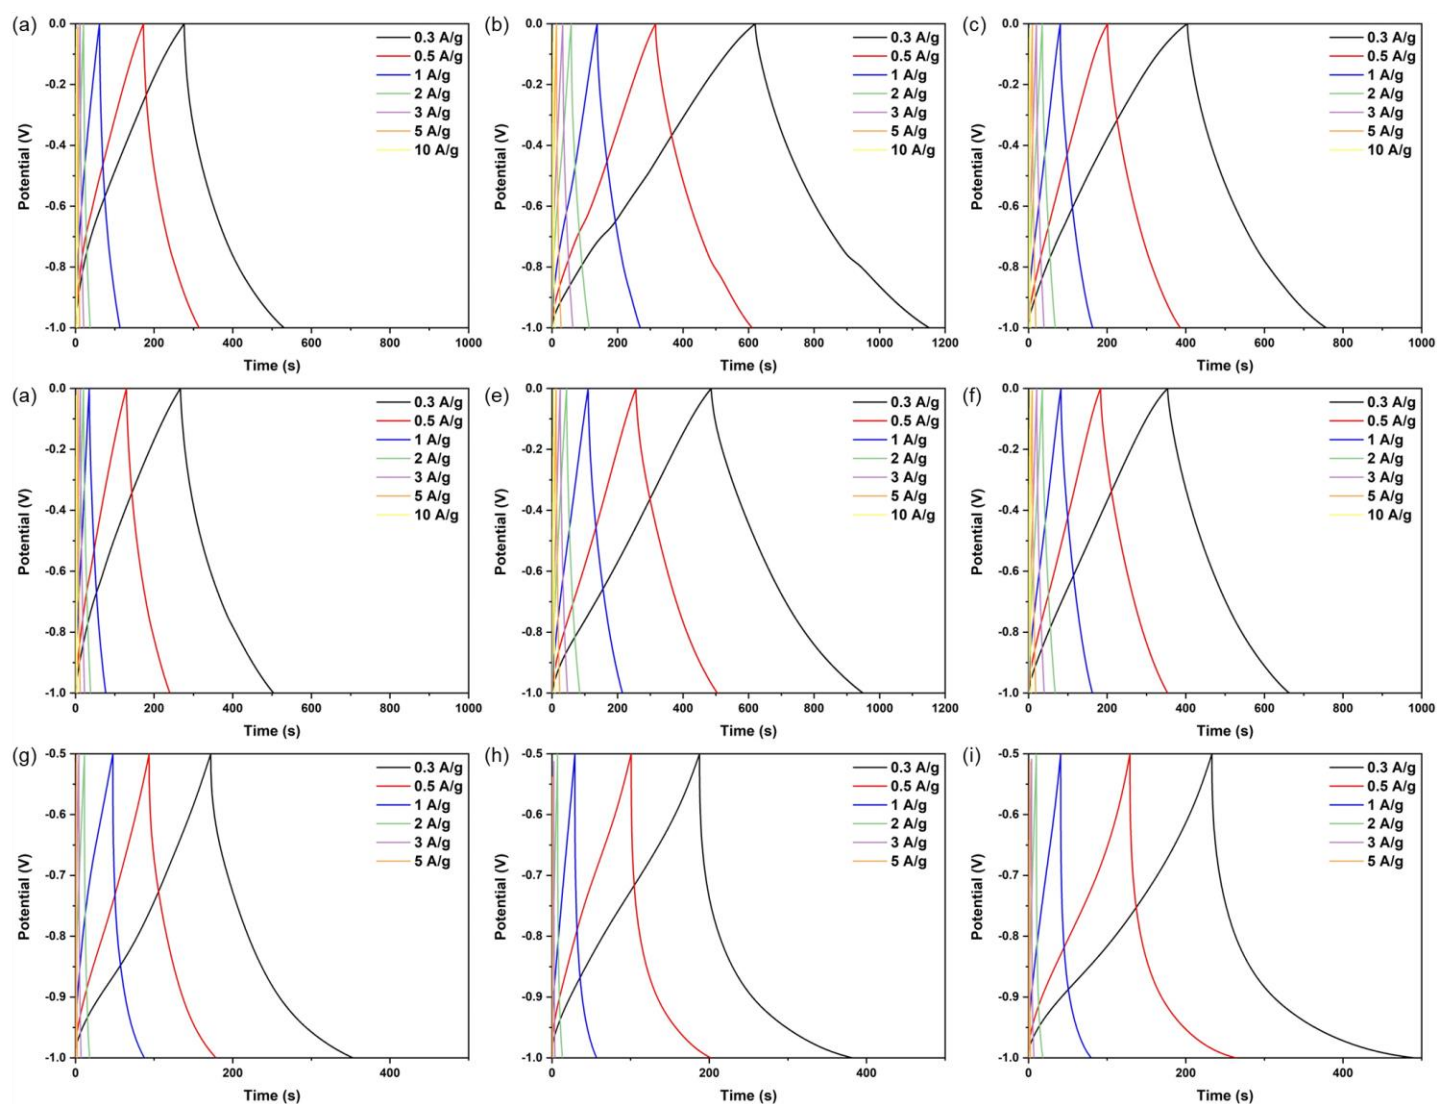

**Figure S3.** The three-electrode electrochemical performances of MIL-100 (Fe) derivatives: GCD curves at different current densities ( $0.3\text{--}5\text{ A g}^{-1}$ ): (a) MDC-A iron; (b) MDC-A nitrate; (c) MDC-A chloride; (d) MDC-B iron; (e) MDC-B nitrate; (f) MDC-B chloride; (g) MDMO iron; (h) MDMO nitrate; (i) MDMO chloride.

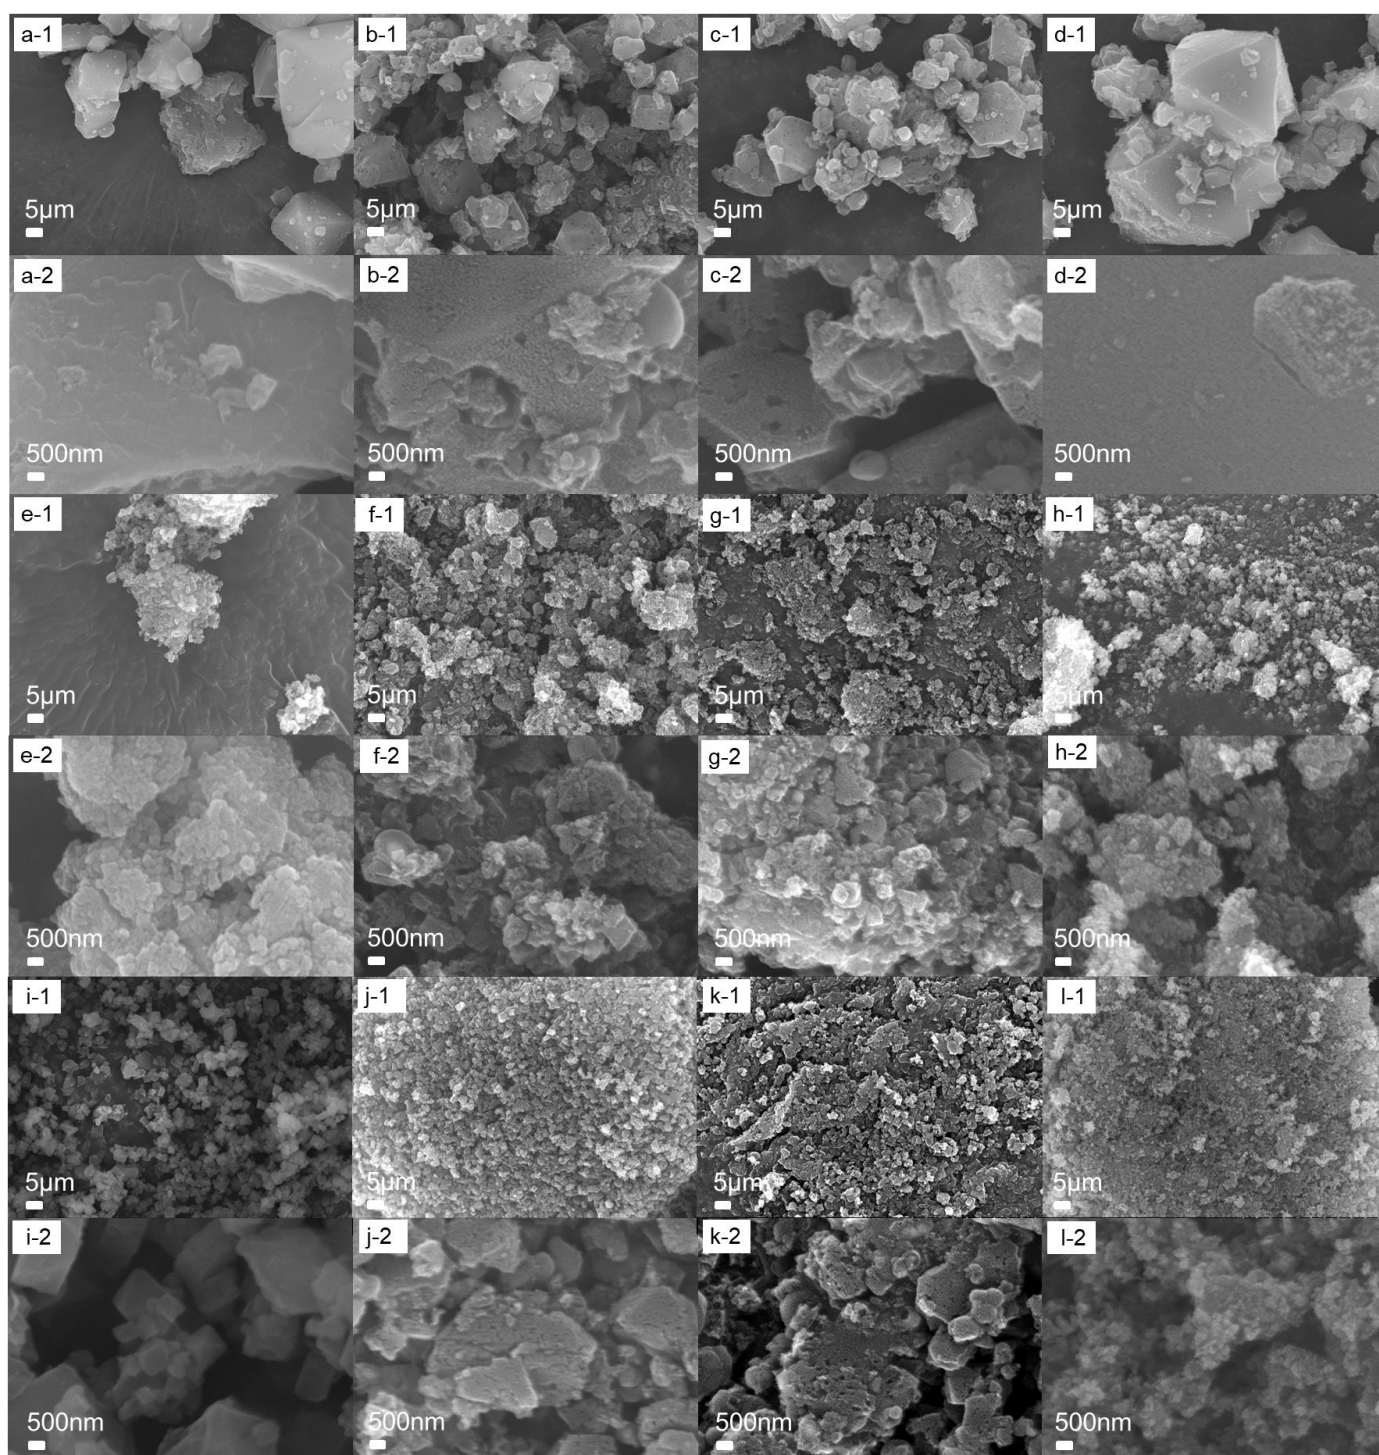

**Figure S4.** SEM images of low (-1) and high magnification (-2): (a) MIL-100 (Fe) iron; (b) MDC-A iron; (c) MDC-B iron; (d) MDMO iron; (e) MIL-100(Fe) nitrate; (f) MDC-A nitrate; (g) MDC-B nitrate; (h) MDMO nitrate; (i) MIL-100 (Fe) chloride; (j) MDC-A chloride; (k) MDC-B chloride; (l) MDMO chloride.

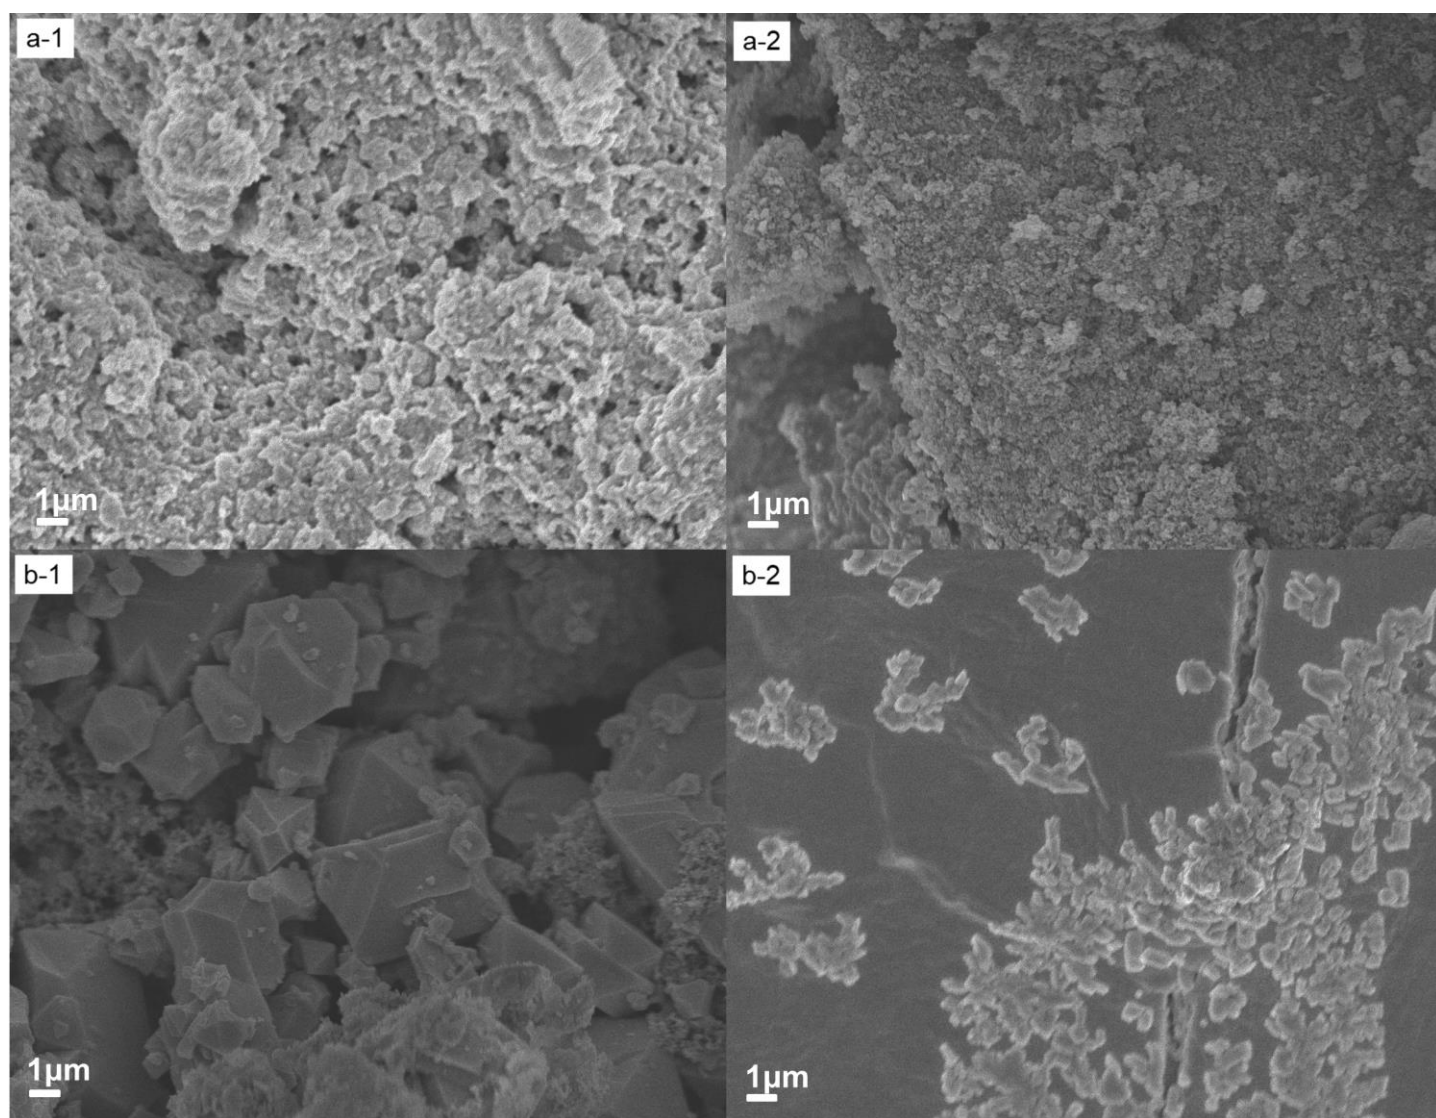

**Figure S5.** SEM images of before cycling test (-1) and after cycling test (-2): (a) MDC-A nitrate; (b) MDMO iron.



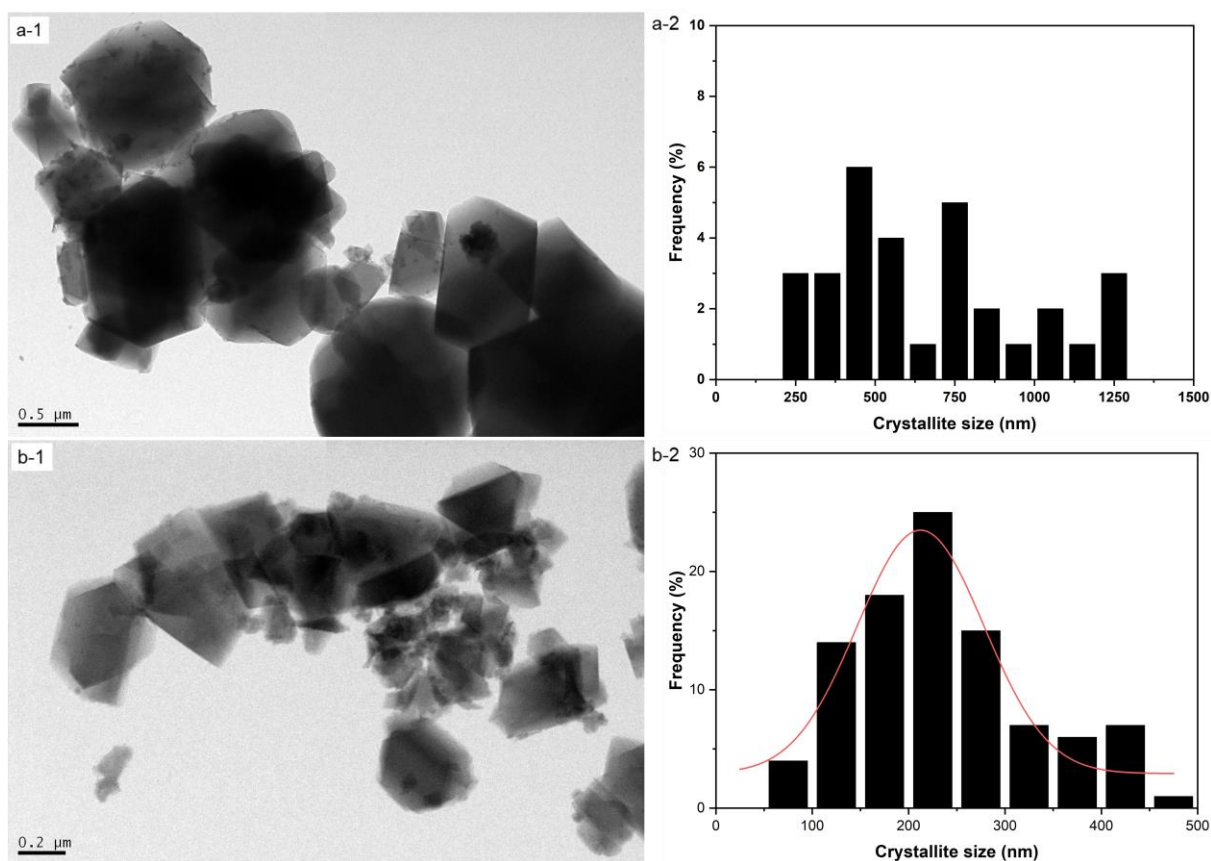

**Figure S6.** TEM images (-1) and crystallite size distribution (-2): (a) MIL-100 (Fe) iron; (b) MIL-100 (Fe) chloride.

**Disclaimer/Publisher's Note:** The statements, opinions and data contained in all publications are solely those of the individual author(s) and contributor(s) and not of MDPI and/or the editor(s). MDPI and/or the editor(s) disclaim responsibility for any injury to people or property resulting from any ideas, methods, instructions or products referred to in the content.
